# Supplementary material
Source: Springer Nature journal article supplement (https://www.springermedizin.de/resource/supplementary/13048_2013_150_MOESM5_ESM.pdf/9664998)

**A****Pa-1**

Par sh.ST6 sh.ST6 cis-res

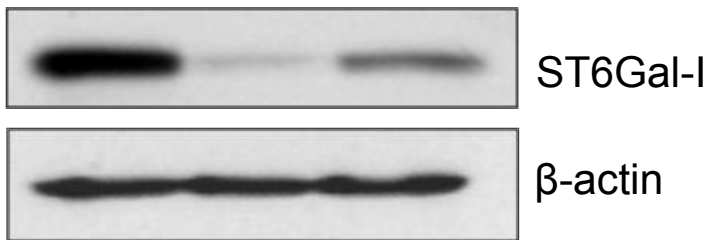**B****Pa-1**

Par sh.ST6 sh.ST6+cis

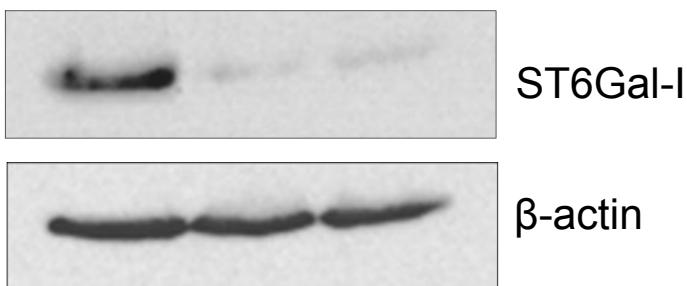**C****A2780**

Par Cis-res

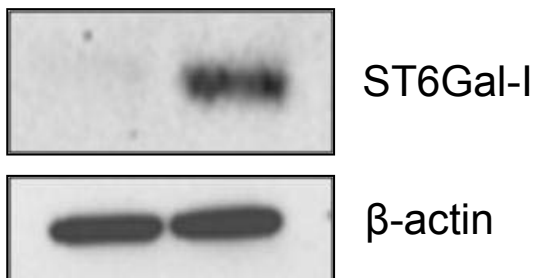

Supplement: MOESM5 [file 9664998]
